# Supplementary material for: Bioinformatic and experimental fishing for artemisinin-interacting proteins from human nasopharyngeal cancer cells
Source: Royal Society of Chemistry journal article supplement (doi:10.1039/c2mb05437j), 2012-02-06
Supplement: c2mb05437j.pdf [file c2mb05437j.pdf]

## **Supporting information**

### **Title of manuscript:**

**Bioinformatic and experimental fishing for artemisinin-interacting proteins from human nasopharyngeal cancer cells**

T. Eichhorn, S. Schloissnig, B. Hahn, A. Wendler, R. Mertens, W.D. Lehmann, R.L. Krauth-Siegel and T. Efferth

## Supplementary Table I:

Top 200 proteins interacting with artemisinin scored by AutoDock

| PDB-ID<br>(+Chain<br>) | SCORE  | UNIPROT ID  | UNIPROT<br>LINK         | DESCRIPTION (Uniprot or PDB)                                                                      |
|------------------------|--------|-------------|-------------------------|---------------------------------------------------------------------------------------------------|
| 1HDP                   | -14,43 | PO2F2_HUMAN | <a href="#">uniprot</a> | POU domain, class 2, transcription factor 2                                                       |
| 1BV8                   | -13,7  | A2MG_HUMAN  | <a href="#">uniprot</a> | Alpha-2-macroglobulin                                                                             |
| 2FLR_2                 | -12,64 | FA7_HUMAN   | <a href="#">uniprot</a> | Coagulation factor VII                                                                            |
| 2CLC_1                 | -12,6  | RASH_HUMAN  | <a href="#">uniprot</a> | GTPase HRas                                                                                       |
| 2CL7_1                 | -12,44 | RASH_HUMAN  | <a href="#">uniprot</a> | GTPase HRas                                                                                       |
| 10PG_2                 | -11,7  |             | <a href="#">uniprot</a> | Crystal structure of the OPG2 Fab. An antireceptor antibody that mimics an RGD cell adhesion site |
| 2CLS_1                 | -11,59 | RND1_HUMAN  | <a href="#">uniprot</a> | Rho-related GTP-binding protein Rho6                                                              |
| 2CLS_2                 | -11,57 | RND1_HUMAN  | <a href="#">uniprot</a> | Rho-related GTP-binding protein Rho6                                                              |
| 2REX_4                 | -11,55 | PLXB1_HUMAN | <a href="#">uniprot</a> | Plexin-B1                                                                                         |
| 2EVW_1                 | -11,54 | RASH_HUMAN  | <a href="#">uniprot</a> | GTPase HRas                                                                                       |
| 1L3K_1                 | -11,53 | ROA1_HUMAN  | <a href="#">uniprot</a> | Heterogeneous nuclear ribonucleoprotein A1                                                        |
| 1Z3N_1                 | -11,47 | ALDR_HUMAN  | <a href="#">uniprot</a> | Aldose reductase                                                                                  |
| 1NVW_1                 | -11,41 | RASH_HUMAN  | <a href="#">uniprot</a> | GTPase HRas                                                                                       |
| 1M9J_2                 | -11,23 | NOS3_HUMAN  | <a href="#">uniprot</a> | Nitric oxide synthase, endothelial                                                                |
| 2RGC                   | -11,14 | RASH_HUMAN  | <a href="#">uniprot</a> | GTPase HRas                                                                                       |
| 2RGE                   | -11,12 | RASH_HUMAN  | <a href="#">uniprot</a> | GTPase HRas                                                                                       |
| 1NVU_1                 | -11,11 | RASH_HUMAN  | <a href="#">uniprot</a> | GTPase HRas                                                                                       |
| 1US0_1                 | -11,09 | ALDR_HUMAN  | <a href="#">uniprot</a> | Aldose reductase                                                                                  |
| 1EFH_2                 | -11,08 | ST2A1_HUMAN | <a href="#">uniprot</a> | Bile salt sulfotransferase                                                                        |
| 1Q22_1                 | -11,08 | ST2B1_HUMAN | <a href="#">uniprot</a> | Sulfotransferase family cytosolic 2B member 1                                                     |
| 2BZG_1                 | -11,07 | TPMT_HUMAN  | <a href="#">uniprot</a> | Thiopurine S-methyltransferase                                                                    |
| 1NVV_1                 | -11,06 | RASH_HUMAN  | <a href="#">uniprot</a> | GTPase HRas                                                                                       |
| 1Q20_1                 | -11,05 | ST2B1_HUMAN | <a href="#">uniprot</a> | Sulfotransferase family cytosolic 2B member 1                                                     |
| 2D06_1                 | -11,05 | ST1A1_HUMAN | <a href="#">uniprot</a> | Sulfotransferase 1A1                                                                              |
| 1K8R_1                 | -11,04 | BYR2_SCHPO  | <a href="#">uniprot</a> | Protein kinase byr2                                                                               |
| 1C1Y_1                 | -11,01 | RAF1_HUMAN  | <a href="#">uniprot</a> | RAF proto-oncogene serine/threonine-protein kinase                                                |
| 2H57_3                 | -11,01 | ARL6_HUMAN  | <a href="#">uniprot</a> | ADP-ribosylation factor-like protein 6                                                            |
| 1NVX_1                 | -11    | RASH_HUMAN  | <a href="#">uniprot</a> | GTPase HRas                                                                                       |
| 2Z5F_1                 | -10,99 | ST1B1_HUMAN | <a href="#">uniprot</a> | Sulfotransferase family cytosolic 1B member 1                                                     |
| 1XRJ_2                 | -10,98 | UCK2_HUMAN  | <a href="#">uniprot</a> | Uridine-cytidine kinase 2                                                                         |
| 1HY3_2                 | -10,96 | ST1E1_HUMAN | <a href="#">uniprot</a> | Estrogen sulfotransferase                                                                         |
| 1G3M_2                 | -10,95 | ST1E1_HUMAN | <a href="#">uniprot</a> | Estrogen sulfotransferase                                                                         |
| 1S3X_1                 | -10,94 | HSP71_HUMAN | <a href="#">uniprot</a> | Heat shock 70 kDa protein 1                                                                       |
| 2A3R_1                 | -10,94 | ST1A3_HUMAN | <a href="#">uniprot</a> | Sulfotransferase 1A3/1A4                                                                          |

|        |        |                 |                         |                                                                                |
|--------|--------|-----------------|-------------------------|--------------------------------------------------------------------------------|
|        |        | N               |                         |                                                                                |
| 2E8A   | -10,93 | HSP71_HUMA<br>N | <a href="#">uniprot</a> | Heat shock 70 kDa protein 1                                                    |
| 2GWH_2 | -10,92 | ST1C4_HUMA<br>N | <a href="#">uniprot</a> | Sulfotransferase 1C4                                                           |
| 2PFH_1 | -10,92 | ALDR_HUMAN      | <a href="#">uniprot</a> | Aldose reductase                                                               |
| 1ZC3_1 | -10,91 | EXOC8_RAT       | <a href="#">uniprot</a> | Exocyst complex component 8                                                    |
| 1KSH_1 | -10,9  | ARL2_MOUSE      | <a href="#">uniprot</a> | ADP-ribosylation factor-like protein 2                                         |
| 3C0Y_3 | -10,9  | HDAC7_HUMA<br>N | <a href="#">uniprot</a> | Histone deacetylase 7                                                          |
| 2GWH_1 | -10,89 | ST1C4_HUMA<br>N | <a href="#">uniprot</a> | Sulfotransferase 1C4                                                           |
| 2UZI_3 | -10,88 | RASH_HUMAN      | <a href="#">uniprot</a> | GTPase HRas                                                                    |
| 3BH7_1 | -10,88 | ARL3_MOUSE      | <a href="#">uniprot</a> | ADP-ribosylation factor-like protein 3                                         |
| 1EFH_1 | -10,87 | ST2A1_HUMA<br>N | <a href="#">uniprot</a> | Bile salt sulfotransferase                                                     |
| 2OW2_2 | -10,86 | MMP9_HUMA<br>N  | <a href="#">uniprot</a> | Matrix metalloproteinase-9                                                     |
| 1KSJ_1 | -10,84 | ARL2_MOUSE      | <a href="#">uniprot</a> | ADP-ribosylation factor-like protein 2                                         |
| 3RAP_1 | -10,83 | RAP2A_HUMA<br>N | <a href="#">uniprot</a> | Ras-related protein Rap-2a                                                     |
| 1HE8_2 | -10,82 | PK3CG_HUMA<br>N | <a href="#">uniprot</a> | Phosphatidylinositol-4,5-bisphosphate 3-kinase catalytic subunit gamma isoform |
| 1KT8_2 | -10,79 | BCAT2_HUMA<br>N | <a href="#">uniprot</a> | Branched-chain-amino-acid aminotransferase, mitochondrial                      |
| 1Q1Q_1 | -10,77 | ST2B1_HUMA<br>N | <a href="#">uniprot</a> | Sulfotransferase family cytosolic 2B member 1                                  |
| 2E9S_1 | -10,77 | RAB6B_HUMA<br>N | <a href="#">uniprot</a> | Ras-related protein Rab-6B                                                     |
| 2H57_1 | -10,74 | ARL6_HUMAN      | <a href="#">uniprot</a> | ADP-ribosylation factor-like protein 6                                         |
| 2H57_2 | -10,74 | ARL6_HUMAN      | <a href="#">uniprot</a> | ADP-ribosylation factor-like protein 6                                         |
| 2CL6_1 | -10,73 | RASH_HUMAN      | <a href="#">uniprot</a> | GTPase HRas                                                                    |
| 1WMA_1 | -10,72 | CBR1_HUMAN      | <a href="#">uniprot</a> | Carbonyl reductase [NADPH] 1                                                   |
| 2GIL_1 | -10,72 | RAB6A_HUMA<br>N | <a href="#">uniprot</a> | Ras-related protein Rab-6A                                                     |
| 1LS6_1 | -10,71 | ST1A1_HUMA<br>N | <a href="#">uniprot</a> | Sulfotransferase 1A1                                                           |
| 2PRL   | -10,7  | PYRD_HUMAN      | <a href="#">uniprot</a> | Dihydroorotate dehydrogenase, mitochondrial                                    |
| 1ZTQ_3 | -10,69 | MMP13_HUMA<br>N | <a href="#">uniprot</a> | Collagenase 3                                                                  |
| 2REO   | -10,69 | ST1C3_HUMA<br>N | <a href="#">uniprot</a> | Putative sulfotransferase 1C3                                                  |
| 1M9K_2 | -10,68 | NOS3_HUMAN      | <a href="#">uniprot</a> | Nitric oxide synthase, endothelial                                             |
| 2FV5_1 | -10,68 | ADA17_HUMA<br>N | <a href="#">uniprot</a> | ADAM 17                                                                        |
| 1Z08_1 | -10,67 | RAB21_HUMA<br>N | <a href="#">uniprot</a> | Ras-related protein Rab-21                                                     |
| 2D39_1 | -10,67 | FCN1_HUMAN      | <a href="#">uniprot</a> | Ficolin-1                                                                      |
| 3BHV_2 | -10,67 | CCNA2_BOVIN     | <a href="#">uniprot</a> | Cyclin-A2                                                                      |
| 10GU_4 | -10,66 | CCNA2_HUMA<br>N | <a href="#">uniprot</a> | Cyclin-A2                                                                      |
| 2CLD_1 | -10,66 | RASH_HUMAN      | <a href="#">uniprot</a> | GTPase HRas                                                                    |
| 1XD2_1 | -10,65 | RASH_HUMAN      | <a href="#">uniprot</a> | GTPase HRas                                                                    |
| 2OW0_  | -10,65 | MMP9_HUMA       | <a href="#">uniprot</a> | Matrix metalloproteinase-9                                                     |

|        |        |                 |                         |                                                           |
|--------|--------|-----------------|-------------------------|-----------------------------------------------------------|
| 2      |        | N               |                         |                                                           |
| 3CKL_1 | -10,63 | ST1B1_HUMA<br>N | <a href="#">uniprot</a> | Sulfotransferase family cytosolic 1B member 1             |
| 1Z08_2 | -10,62 | RAB21_HUMA<br>N | <a href="#">uniprot</a> | Ras-related protein Rab-21                                |
| 2FGB_1 | -10,61 | AK1C3_HUMA<br>N | <a href="#">uniprot</a> | Aldo-keto reductase family 1 member C3                    |
| 10IU_2 | -10,6  | CCNA2_HUMA<br>N | <a href="#">uniprot</a> | Cyclin-A2                                                 |
| 1RMZ_1 | -10,6  | MMP12_HUMA<br>N | <a href="#">uniprot</a> | Macrophage metalloelastase                                |
| 1YZQ_1 | -10,6  | RAB6A_HUMA<br>N | <a href="#">uniprot</a> | Ras-related protein Rab-6A                                |
| 10GU_2 | -10,59 | CCNA2_HUMA<br>N | <a href="#">uniprot</a> | Cyclin-A2                                                 |
| 1UEA_1 | -10,59 | MMP3_HUMA<br>N  | <a href="#">uniprot</a> | Stromelysin-1                                             |
| 20VZ_1 | -10,59 | MMP9_HUMA<br>N  | <a href="#">uniprot</a> | Matrix metalloproteinase-9                                |
| 1UAD_2 | -10,58 | EXOC2_RAT       | <a href="#">uniprot</a> | Exocyst complex component 2                               |
| 1S1P_1 | -10,56 | AK1C3_HUMA<br>N | <a href="#">uniprot</a> | Aldo-keto reductase family 1 member C3                    |
| 1S1R_1 | -10,55 | AK1C3_HUMA<br>N | <a href="#">uniprot</a> | Aldo-keto reductase family 1 member C3                    |
| 1ZQ5_1 | -10,55 | AK1C3_HUMA<br>N | <a href="#">uniprot</a> | Aldo-keto reductase family 1 member C3                    |
| 3CKL_2 | -10,55 | ST1B1_HUMA<br>N | <a href="#">uniprot</a> | Sulfotransferase family cytosolic 1B member 1             |
| 1OIX_1 | -10,54 | RB11A_HUMA<br>N | <a href="#">uniprot</a> | Ras-related protein Rab-11A                               |
| 3C0Z_3 | -10,54 | HDAC7_HUMA<br>N | <a href="#">uniprot</a> | Histone deacetylase 7                                     |
| 1KTA_1 | -10,53 | BCAT2_HUMA<br>N | <a href="#">uniprot</a> | Branched-chain-amino-acid aminotransferase, mitochondrial |
| 1QIA_1 | -10,53 | MMP3_HUMA<br>N  | <a href="#">uniprot</a> | Stromelysin-1                                             |
| 1A8F_1 | -10,52 | TRFE_HUMAN      | <a href="#">uniprot</a> | Serotransferrin                                           |
| 2Q0Z_1 | -10,52 | U520_HUMAN      | <a href="#">uniprot</a> | U5 small nuclear ribonucleoprotein 200 kDa helicase       |
| 9JDW_1 | -10,52 | GATM_HUMAN      | <a href="#">uniprot</a> | Glycine amidinotransferase, mitochondrial                 |
| 1YBW_1 | -10,51 | HGFA_HUMAN      | <a href="#">uniprot</a> | Hepatocyte growth factor activator                        |
| 2EXX_2 | -10,51 | NMRL1_HUMA<br>N | <a href="#">uniprot</a> | NmrA-like family domain-containing protein 1              |
| 121P_1 | -10,5  | RASH_HUMAN      | <a href="#">uniprot</a> | GTPase HRas                                               |
| 20W0_1 | -10,5  | MMP9_HUMA<br>N  | <a href="#">uniprot</a> | Matrix metalloproteinase-9                                |
| 1G4G   | -10,49 | APOH_HUMAN      | <a href="#">uniprot</a> | Beta-2-glycoprotein 1                                     |
| 2I7T_1 | -10,49 | CPSF3_HUMA<br>N | <a href="#">uniprot</a> | Cleavage and polyadenylation specificity factor subunit 3 |
| 2ATH_1 | -10,47 | PPARG_HUMA<br>N | <a href="#">uniprot</a> | Peroxisome proliferator-activated receptor gamma          |
| 2COI_1 | -10,47 | BCAT1_HUMA<br>N | <a href="#">uniprot</a> | Branched-chain-amino-acid aminotransferase, cytosolic     |
| 2QME_1 | -10,47 | RAC3_HUMAN      | <a href="#">uniprot</a> | Ras-related C3 botulinum toxin substrate 3                |
| 421P_1 | -10,47 | RASH_HUMAN      | <a href="#">uniprot</a> | GTPase HRas                                               |

|        |        |                 |                         |                                                                     |
|--------|--------|-----------------|-------------------------|---------------------------------------------------------------------|
| 1XF0_1 | -10,46 | AK1C3_HUMA<br>N | <a href="#">uniprot</a> | Aldo-keto reductase family 1 member C3                              |
| 1YRY_1 | -10,46 | PNPH_HUMAN      | <a href="#">uniprot</a> | Purine nucleoside phosphorylase                                     |
| 1Q1Z_1 | -10,44 | ST2B1_HUMA<br>N | <a href="#">uniprot</a> | Sulfotransferase family cytosolic 2B member 1                       |
| 1S2C_1 | -10,43 | AK1C3_HUMA<br>N | <a href="#">uniprot</a> | Aldo-keto reductase family 1 member C3                              |
| 1SUV_2 | -10,43 | TFR1_HUMAN      | <a href="#">uniprot</a> | Transferrin receptor protein 1                                      |
| 2B9R_2 | -10,42 | CCNB1_HUMA<br>N | <a href="#">uniprot</a> | G2/mitotic-specific cyclin-B1                                       |
| 2F38_1 | -10,42 | AK1C3_HUMA<br>N | <a href="#">uniprot</a> | Aldo-keto reductase family 1 member C3                              |
| 2OW1_2 | -10,42 | MMP9_HUMA<br>N  | <a href="#">uniprot</a> | Matrix metalloproteinase-9                                          |
| 521P_1 | -10,42 | RASH_HUMAN      | <a href="#">uniprot</a> | GTPase HRas                                                         |
| 1BZY_1 | -10,41 | HPRT_HUMAN      | <a href="#">uniprot</a> | Hypoxanthine-guanine phosphoribosyltransferase                      |
| 1DVA_1 | -10,41 | FA7_HUMAN       | <a href="#">uniprot</a> | Coagulation factor VII                                              |
| 1YZT_2 | -10,41 | RAB21_HUMA<br>N | <a href="#">uniprot</a> | Ras-related protein Rab-21                                          |
| 1RYO_1 | -10,4  | TRFE_HUMAN      | <a href="#">uniprot</a> | Serotransferrin                                                     |
| 2C5L_1 | -10,4  | PLCE1_HUMA<br>N | <a href="#">uniprot</a> | 1-phosphatidylinositol-4,5-bisphosphate phosphodiesterase epsilon-1 |
| 3BHV_4 | -10,4  | CCNA2_BOVIN     | <a href="#">uniprot</a> | Cyclin-A2                                                           |
| 1E96_1 | -10,39 | NCF2_HUMAN      | <a href="#">uniprot</a> | Neutrophil cytosol factor 2                                         |
| 1JST_2 | -10,39 | CCNA2_HUMA<br>N | <a href="#">uniprot</a> | Cyclin-A2                                                           |
| 1ZD9_1 | -10,38 | ARL8A_HUMA<br>N | <a href="#">uniprot</a> | ADP-ribosylation factor-like protein 8A                             |
| 2HD5_1 | -10,38 | UBIQ_BOVIN      | <a href="#">uniprot</a> | Ubiquitin                                                           |
| 1G3M_1 | -10,37 | ST1E1_HUMA<br>N | <a href="#">uniprot</a> | Estrogen sulfotransferase                                           |
| 1M9K_1 | -10,36 | NOS3_HUMAN      | <a href="#">uniprot</a> | Nitric oxide synthase, endothelial                                  |
| 3BFX_2 | -10,35 | ST1C2_HUMA<br>N | <a href="#">uniprot</a> | Sulfotransferase 1C2                                                |
| 1AGP_1 | -10,34 | RASH_HUMAN      | <a href="#">uniprot</a> | GTPase HRas                                                         |
| 2DVQ_1 | -10,34 | BRD2_HUMAN      | <a href="#">uniprot</a> | Bromodomain-containing protein 2                                    |
| 2Z5F_2 | -10,34 | ST1B1_HUMA<br>N | <a href="#">uniprot</a> | Sulfotransferase family cytosolic 1B member 1                       |
| 1N6K_1 | -10,33 | RAB5A_HUMA<br>N | <a href="#">uniprot</a> | Ras-related protein Rab-5A                                          |
| 1X9Q_1 | -10,33 |                 | <a href="#">uniprot</a> | 4m5.3 anti-fluorescein single chain antibody fragment               |
| 2CE2_1 | -10,33 | RASH_HUMAN      | <a href="#">uniprot</a> | GTPase HRas                                                         |
| 2Q8E_2 | -10,33 | JHD3A_HUMA<br>N | <a href="#">uniprot</a> | JmjC domain-containing histone demethylation protein 3A             |
| 1EK5_1 | -10,32 | GALE_HUMAN      | <a href="#">uniprot</a> | UDP-glucose 4-epimerase                                             |
| 2BWG_3 | -10,32 | GMPR1_HUMA<br>N | <a href="#">uniprot</a> | GMP reductase 1                                                     |
| 2FFQ_1 | -10,32 | RAB6B_HUMA<br>N | <a href="#">uniprot</a> | Ras-related protein Rab-6B                                          |
| 1HE1_3 | -10,31 | RAC1_HUMAN      | <a href="#">uniprot</a> | Ras-related C3 botulinum toxin substrate 1                          |
| 1WNT_1 | -10,31 | DCXR_HUMAN      | <a href="#">uniprot</a> | L-xylulose reductase                                                |
| 1YZU_1 | -10,31 | RAB21_HUMA<br>N | <a href="#">uniprot</a> | Ras-related protein Rab-21                                          |

|        |        |             |                         |                                                                 |
|--------|--------|-------------|-------------------------|-----------------------------------------------------------------|
| 2DVR_1 | -10,31 | BRD2_HUMAN  | <a href="#">uniprot</a> | Bromodomain-containing protein 2                                |
| 2DVS_1 | -10,31 | BRD2_HUMAN  | <a href="#">uniprot</a> | Bromodomain-containing protein 2                                |
| 1H28_2 | -10,3  | CCNA2_HUMAN | <a href="#">uniprot</a> | Cyclin-A2                                                       |
| 1HE1_4 | -10,3  | RAC1_HUMAN  | <a href="#">uniprot</a> | Ras-related C3 botulinum toxin substrate 1                      |
| 1T91_1 | -10,3  | RAB7A_HUMAN | <a href="#">uniprot</a> | Ras-related protein Rab-7a                                      |
| 1ZW6_1 | -10,3  | RASH_HUMAN  | <a href="#">uniprot</a> | GTPase HRas                                                     |
| 2RBE_2 | -10,3  |             | <a href="#">uniprot</a> | The discovery of 2-anilinothiazolones as 11beta-HSD1 inhibitors |
| 1P2V_1 | -10,29 | RASH_HUMAN  | <a href="#">uniprot</a> | GTPase HRas                                                     |
| 1R3W_1 | -10,29 | DCUP_HUMAN  | <a href="#">uniprot</a> | Uroporphyrinogen decarboxylase                                  |
| 1YZT_1 | -10,29 | RAB21_HUMAN | <a href="#">uniprot</a> | Ras-related protein Rab-21                                      |
| 2RBE_4 | -10,29 |             | <a href="#">uniprot</a> | The discovery of 2-anilinothiazolones as 11beta-HSD1 inhibitors |
| 1ERR_1 | -10,28 | ESR1_HUMAN  | <a href="#">uniprot</a> | Estrogen receptor                                               |
| 1NCV   | -10,28 | CCL7_HUMAN  | <a href="#">uniprot</a> | C-C motif chemokine 7                                           |
| 3BCJ   | -10,28 | ALDR_HUMAN  | <a href="#">uniprot</a> | Aldose reductase                                                |
| 1GUA_1 | -10,27 | RAF1_HUMAN  | <a href="#">uniprot</a> | RAF proto-oncogene serine/threonine-protein kinase              |
| 2FXK_1 | -10,27 | H2AY_HUMAN  | <a href="#">uniprot</a> | Core histone macro-H2A.1                                        |
| 1I3M_2 | -10,26 | GALE_HUMAN  | <a href="#">uniprot</a> | UDP-glucose 4-epimerase                                         |
| 1JDX_1 | -10,26 | GATM_HUMAN  | <a href="#">uniprot</a> | Glycine amidinotransferase, mitochondrial                       |
| 1QMB_1 | -10,26 | A1AT_HUMAN  | <a href="#">uniprot</a> | Alpha-1-antitrypsin                                             |
| 2Q8E_1 | -10,25 | JHD3A_HUMAN | <a href="#">uniprot</a> | JmjC domain-containing histone demethylation protein 3A         |
| 2RBE_3 | -10,25 |             | <a href="#">uniprot</a> | The discovery of 2-anilinothiazolones as 11beta-HSD1 inhibitors |
| 1ZMD_3 | -10,24 | DLDH_HUMAN  | <a href="#">uniprot</a> | Dihydrolipoyl dehydrogenase, mitochondrial                      |
| 2OV2_4 | -10,24 | PAK4_HUMAN  | <a href="#">uniprot</a> | Serine/threonine-protein kinase PAK 4                           |
| 2RDW   | -10,23 | HAOX1_HUMAN | <a href="#">uniprot</a> | Hydroxyacid oxidase 1                                           |
| 1JMO_2 | -10,22 | HEP2_HUMAN  | <a href="#">uniprot</a> | Heparin cofactor 2                                              |
| 1S2A_1 | -10,22 | AK1C3_HUMAN | <a href="#">uniprot</a> | Aldo-keto reductase family 1 member C3                          |
| 2BWG_2 | -10,22 | GMPR1_HUMAN | <a href="#">uniprot</a> | GMP reductase 1                                                 |
| 2OV2_3 | -10,22 | PAK4_HUMAN  | <a href="#">uniprot</a> | Serine/threonine-protein kinase PAK 4                           |
| 2OW1_1 | -10,22 | MMP9_HUMAN  | <a href="#">uniprot</a> | Matrix metalloproteinase-9                                      |
| 2Q3F_1 | -10,22 | RRAGD_HUMAN | <a href="#">uniprot</a> | Ras-related GTP-binding protein D                               |
| 2BWG_1 | -10,21 | GMPR1_HUMAN | <a href="#">uniprot</a> | GMP reductase 1                                                 |
| 2IW8_2 | -10,21 | CCNA2_HUMAN | <a href="#">uniprot</a> | Cyclin-A2                                                       |
| 966C_1 | -10,21 | MMP1_HUMAN  | <a href="#">uniprot</a> | Interstitial collagenase                                        |
| 1N7W_1 | -10,2  | TRFE_HUMAN  | <a href="#">uniprot</a> | Serotransferrin                                                 |
| 1PJ3_1 | -10,2  | MAOM_HUMAN  | <a href="#">uniprot</a> | NAD-dependent malic enzyme, mitochondrial                       |
| 1Z28_1 | -10,2  | ST1A1_HUMAN | <a href="#">uniprot</a> | Sulfotransferase 1A1                                            |

|        |        |                 |                         |                                                          |
|--------|--------|-----------------|-------------------------|----------------------------------------------------------|
|        |        | N               |                         |                                                          |
| 2E82_1 | -10,2  | OXDA_HUMAN      | <a href="#">uniprot</a> | D-amino-acid oxidase                                     |
| 2H8K   | -10,2  | ST1C3_HUMA<br>N | <a href="#">uniprot</a> | Putative sulfotransferase 1C3                            |
| 5P21_1 | -10,2  | RASH_HUMAN      | <a href="#">uniprot</a> | GTPase HRas                                              |
| 20X0_2 | -10,19 | JHD3A_HUMA<br>N | <a href="#">uniprot</a> | JmjC domain-containing histone demethylation protein 3A  |
| 2REX_2 | -10,19 | PLXB1_HUMA<br>N | <a href="#">uniprot</a> | Plexin-B1                                                |
| 3BT1_2 | -10,19 | UPAR_HUMAN      | <a href="#">uniprot</a> | Urokinase plasminogen activator surface receptor         |
| 721P_1 | -10,19 | RASH_HUMAN      | <a href="#">uniprot</a> | GTPase HRas                                              |
| 8JDW_1 | -10,19 | GATM_HUMAN      | <a href="#">uniprot</a> | Glycine amidinotransferase, mitochondrial                |
| 1PWM_1 | -10,18 | ALDR_HUMAN      | <a href="#">uniprot</a> | Aldose reductase                                         |
| 1R4A_1 | -10,18 | ARL1_RAT        | <a href="#">uniprot</a> | ADP-ribosylation factor-like protein 1                   |
| 2H4Z_2 | -10,18 | PMGE_HUMAN      | <a href="#">uniprot</a> | Bisphosphoglycerate mutase                               |
| 2OV2_2 | -10,17 | PAK4_HUMAN      | <a href="#">uniprot</a> | Serine/threonine-protein kinase PAK 4                    |
| 1RY8_1 | -10,16 | AK1C3_HUMA<br>N | <a href="#">uniprot</a> | Aldo-keto reductase family 1 member C3                   |
| 1T5A_1 | -10,16 | KPYM_HUMAN      | <a href="#">uniprot</a> | Pyruvate kinase isozymes M1/M2                           |
| 2DU8_1 | -10,16 | OXDA_HUMAN      | <a href="#">uniprot</a> | D-amino-acid oxidase                                     |
| 2FVL_1 | -10,16 | AK1C4_HUMA<br>N | <a href="#">uniprot</a> | Aldo-keto reductase family 1 member C4                   |
| 2I40_4 | -10,16 | CCNA2_HUMA<br>N | <a href="#">uniprot</a> | Cyclin-A2                                                |
| 2OV2_1 | -10,16 | PAK4_HUMAN      | <a href="#">uniprot</a> | Serine/threonine-protein kinase PAK 4                    |
| 2QXM_1 | -10,16 | ESR1_HUMAN      | <a href="#">uniprot</a> | Estrogen receptor                                        |
| 3BFX_1 | -10,15 | ST1C2_HUMA<br>N | <a href="#">uniprot</a> | Sulfotransferase 1C2                                     |
| 1A1M_1 | -10,14 | 1B53_HUMAN      | <a href="#">uniprot</a> | HLA class I histocompatibility antigen, B-53 alpha chain |
| 1EUB_1 | -10,14 | MMP13_HUMA<br>N | <a href="#">uniprot</a> | Collagenase 3                                            |
| 1FDU_2 | -10,14 | DHB1_HUMAN      | <a href="#">uniprot</a> | Estradiol 17-beta-dehydrogenase 1                        |
| 1M9Q_1 | -10,14 | NOS3_HUMAN      | <a href="#">uniprot</a> | Nitric oxide synthase, endothelial                       |
| 1RY0_1 | -10,14 | AK1C3_HUMA<br>N | <a href="#">uniprot</a> | Aldo-keto reductase family 1 member C3                   |
| 1VYW_2 | -10,13 | CCNA2_HUMA<br>N | <a href="#">uniprot</a> | Cyclin-A2                                                |
| 1VYW_4 | -10,13 | CCNA2_HUMA<br>N | <a href="#">uniprot</a> | Cyclin-A2                                                |
| 1ZTQ_4 | -10,13 | MMP13_HUMA<br>N | <a href="#">uniprot</a> | Collagenase 3                                            |
| 2BPM_2 | -10,13 | CCNA2_HUMA<br>N | <a href="#">uniprot</a> | Cyclin-A2                                                |
